# Supplementary material for: Kinetics of radical copolymerization of vinylidene fluoride with tert-butyl 2-trifluoromethyl acrylate: a suitable pair for the synthesis of alternating fluorinated copolymers
Source: Royal Society of Chemistry journal article supplement (doi:10.1039/c8py00681d), 2018-01-01
Supplement: c8py00681d1.pdf [file c8py00681d1.pdf]

## Supporting Information

### Kinetics of Radical Copolymerization of Vinylidene fluoride with *tert*-butyl 2-trifluoromethyl Acrylate: A Suitable Pair for the Synthesis of Alternating Fluorinated Copolymers

*Panagiotis G. Falireas,\* Mohammad Wehbi,\* Bruno Améduri*

*Institut Charles Gerhardt, ICGM, UMR 5253 CNRS, Université de Montpellier,  
CNRS, ENSCM, Team IAM, Place Eugène Bataillon, 34095 Montpellier Cedex 5,  
France,*

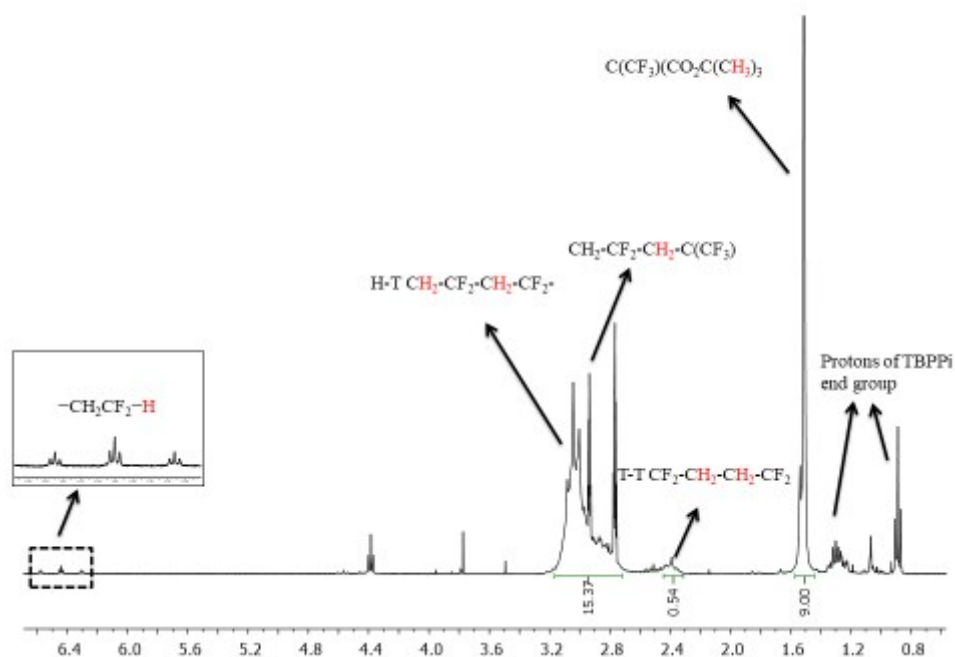

**Figure S1.**  $^1\text{H}$  NMR spectrum, recorded in  $\text{DMF-d}_7$ , of final poly(VDF-co-MAF-TBE) copolymer (from Figure 2, 7 hrs).

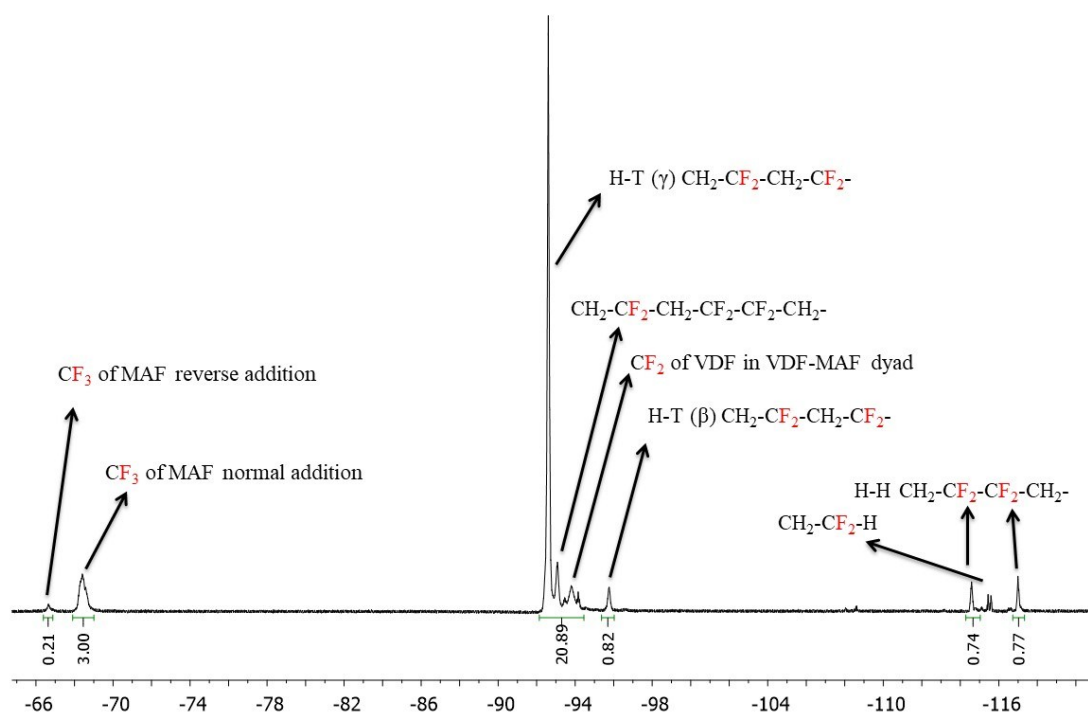

**Figure S2.**  $^{19}\text{F}$  NMR spectrum, recorded in  $\text{DMF-d}_7$ , of final poly(VDF-*co*-MAF-TBE) copolymer (from Figure 2, 7 hrs).

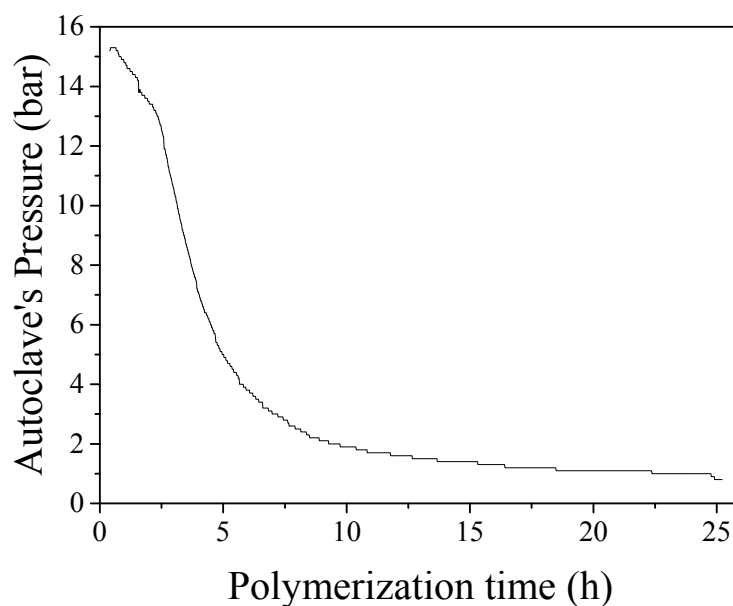

**Figure S3.** Evolution of autoclave pressure *versus* polymerization time of the radical copolymerization of VDF with MAF-TBE in DMC at 57 °C.
